# Supplementary material
Source: publisher figshare collection journal article supplement (https://acs.figshare.com/ndownloader/files/5824488)
Supplement: Supplementary file 1 [file 5824488]

# Macromolecules

Macromolecules, 1998, 31(17), 5955-5957, DOI:[10.1021/ma9807264](https://doi.org/10.1021/ma9807264)

## Terms & Conditions

Electronic Supporting Information files are available without a subscription to ACS Web Editions. The American Chemical Society holds a copyright ownership interest in any copyrightable Supporting Information. Files available from the ACS website may be downloaded for personal use only. Users are not otherwise permitted to reproduce, republish, redistribute, or sell any Supporting Information from the ACS website, either in whole or in part, in either machine-readable form or any other form without permission from the American Chemical Society. For permission to reproduce, republish and redistribute this material, requesters must process their own requests via the RightsLink permission system. Information about how to use the RightsLink permission system can be found at <http://pubs.acs.org/page/copyright/permissions.html>

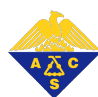

ACS Publications

MOST TRUSTED. MOST CITED. MOST READ.

Copyright © 1998 American Chemical Society

### Supporting Information

**Synthesis of ((2,2,6,6-Tetramethylpiperidinyloxy)methyl)benzene (2).** To a Schlenk flask was added benzyl bromide, 0.50 mL (4.2 mmol); TEMPO, 0.79 g (5.04 mmol); copper powder, 0.28 g (4.4 mmol); Cu(OTf)<sub>2</sub>, 0.015 g (0.042 mmol); dTbpy, 45 mg (0.17 mmol) and 5.0 mL of benzene. The reaction solution was degassed, put under argon and heated to 75 °C for 12 h. The reaction solution was loaded onto an alumina column and eluted with 95:5 hexanes:CH<sub>2</sub>Cl<sub>2</sub>. **2** eluted as a colorless fraction before the excess TEMPO. Solvent was removed to yield 0.99 g (4.01 mmol) of **2** as a very pale yellow oil. Isolated yield = 96 %. <sup>1</sup>H NMR: CDCl<sub>3</sub> (δ vs TMS): δ 7.41-7.20 ppm, m, 5H (Ph); 4.82 ppm, s, 2H (benzyl CH<sub>2</sub>); 1.65-0.90 ppm, broad, 18H (TEMPO). <sup>13</sup>C NMR. CDCl<sub>3</sub> (δ vs TMS): 138.2, 128.2, 127.4, 127.3, 78.8, 60.0, 39.8, 33.1, 20.3, 17.1. Protonated **2** has m/z = 248.0 by electrospray LCQ-MS.

**Synthesis of Methyl 2-(2,2,6,6-Tetramethylpiperidinyloxy)propionate (3).** To a Schlenk flask was added methyl-2-bromopropionate, 0.50 mL (4.5 mmol); TEMPO, 0.84 g (5.4 mmol); copper powder, 0.30 g (4.7 mmol); Cu(OTf)<sub>2</sub>, 0.016 g (0.045 mmol); dTbpy, 48 mg (0.18 mmol) and 5.0 mL of benzene. The reaction solution was degassed, put under argon and heated to 75 °C for 12 h. The reaction solution was loaded onto an alumina column and eluted with 95:5 hexanes:CH<sub>2</sub>Cl<sub>2</sub>. **3** eluted as a colorless fraction and some mixed with the excess TEMPO. Two fractions were collected. Solvent was removed from the first fraction to yield 0.56g (2.3 mmol) of **3**. The second fraction was taken to dryness and dissolved in a minimal amount of hexanes and loaded on another alumina column and eluted with with 95:5 hexanes:CH<sub>2</sub>Cl<sub>2</sub>. The fraction before the excess TEMPO eluted was collected as a colorless solution. Solvent was removed to yield 0.27 g

(1.1 mmol) of **3** as a very pale yellow oil. Combined isolated yield = 75 %.  $^1\text{H}$  NMR:  $\text{CDCl}_3$  ( $\delta$  vs TMS):  $\delta$  4.34 ppm, q,  $^3J_{\text{HH}} = 7$  Hz, 1H (C-CHCH<sub>3</sub>O); 3.70 ppm, s, 3H (methoxy group); 1.50 - 1.00 ppm, broad, 18H (TEMPO); 1.40 ppm, d,  $^3J_{\text{HH}} = 7$  Hz, 3H (C-CHCH<sub>3</sub>O).  $^{13}\text{C}$  NMR:  $\text{CDCl}_3$  ( $\delta$  vs TMS): 174.4, 81.6, 51.4, 40.3, 33.7, 32.9, 20.2, 18.2, 17.2. Protonated **3** has  $m/z = 244.1$  by electrospray LCQ-MS.

**Synthesis of Ethyl 2-(2,2,6,6-Tetramethylpiperidinyloxy)isobutyrate (4).** To a Schlenk flask was added ethyl-2-bromoisobutyrate, 0.10 mL (0.68 mmol); TEMPO, 0.128 g (0.82 mmol); copper powder, 0.045 g (0.72 mmol);  $\text{Cu}(\text{OTf})_2$ , 0.002 g (0.0068 mmol); dNbpy, 0.011 g (0.027 mmol) and 1.0 mL of benzene. The reaction solution was degassed, put under argon and heated to 55 °C for 18 h. The reaction solution was loaded onto an alumina column and eluted with 9:1 hexanes: $\text{CH}_2\text{Cl}_2$ . **4** eluted as a colorless fraction before the excess TEMPO. Solvent was removed to yield 0.17 g (0.63 mmol) of **4** as a very pale yellow oil. Isolated yield = 92 %.  $^1\text{H}$  NMR:  $\text{CDCl}_3$  ( $\delta$  vs TMS):  $\delta$  4.17 ppm, q,  $^3J_{\text{HH}} = 7$  Hz, 2H ( $\text{CH}_3\text{CH}_2\text{O}$ ); 1.61-1.36 ppm, m, 4H (TEMPO methylene); 1.35-1.21 ppm, m, 2H (TEMPO methylene); 1.29 ppm, t,  $^3J_{\text{HH}} = 7$  Hz, 3H ( $\text{CH}_3\text{CH}_2\text{O}$ ); 1.48 ppm, s, 6H; 1.16 ppm, s, 6H; 1.02 ppm, s, 6H ( $(\text{CH}_3)_2\text{C}$ ; TEMPO methyls).  $^{13}\text{C}$  NMR:  $\text{CDCl}_3$  ( $\delta$  vs TMS): 81.1, 60.5, 59.5, 40.6, 33.4, 24.5, 20.4, 17.1, 14.1, carbonyl C was not observed. Protonated **4** has  $m/z = 272.0$  by electrospray LCQ-MS.

**Synthesis of 2-(2,2,6,6-Tetramethylpiperidinyloxy)propionitrile (5).** To a Schlenk flask was added 2-bromo propionitrile, 0.50 mL (5.8 mmol); TEMPO, 1.08 g (6.9 mmol); copper powder, 0.38 g (6.07 mmol);  $\text{Cu}(\text{OTf})_2$ , 0.021 g (0.058 mmol); dTbpy, 62 mg (0.23 mmol) and 5.0 mL of benzene. The reaction solution was degassed, put under argon and heated to 75 °C for 8 h. The reaction solution was loaded onto an alumina

column and eluted with 95:5 hexanes:CH<sub>2</sub>Cl<sub>2</sub>. **5** eluted as a colorless fraction and some mixed with the excess TEMPO. Two fractions were collected. Solvent was removed from the first fraction to yield 0.80 g (3.8 mmol) of **5**. The second fraction was taken to dryness and dissolved in a minimal amount of hexanes and loaded on another alumina column and eluted with 95:5 hexanes:CH<sub>2</sub>Cl<sub>2</sub>. The fraction before the excess TEMPO eluted was collected as a colorless solution. Solvent was removed to yield 0.12 g (0.57 mmol) of **5** as a very pale yellow oil. Combined isolated yield = 76 %. <sup>1</sup>H NMR (CDCl<sub>3</sub>, δ vs TMS): 4.65 ppm, q, <sup>3</sup>J<sub>HH</sub> = 7 Hz, 1H (methine proton); 1.56 ppm, d, <sup>3</sup>J<sub>HH</sub> = 7 Hz, 3H (propionitrile methyl); diastereotopic methylene protons in a range from 1.54 - 1.40 ppm, m, 6H (TEMPO methylene protons); 1.35 ppm, 1.16 ppm, 1.11 ppm, 1.10 ppm, 12H (TEMPO methyl groups). <sup>13</sup>C NMR (CDCl<sub>3</sub>, δ vs TMS): 120.3, 70.0, 60.7, 59.7, 39.9, 34.1, 33.5, 20.3, 20.1, 19.2, 17.0. Protonated **5** has m/z = 232.8 by electrospray LCQ-MS.

**Synthesis of 1-(2,2,6,6-tetramethyl-4-hydroxyperidinyloxy)-1-phenylethane (6).** **6** was prepared under similar conditions as **1**. Protonated **6** has m/z = 278.0 by electrospray LCQ-MS.
